# Supplementary material for: Population-based estimates of hepatitis E virus associated mortality in Bangladesh
Source: bioRxiv or medRxiv preprint supplement (doi:10.1101/2024.08.24.24312522), 2024-08-26
Supplement: Supplementary file [file media-1.pdf]

# Appendices

## Appendix 1: Projected population and live-births in 2014 in the catchment areas of the six acute jaundice surveillance hospitals, Bangladesh

| Surveillance hospitals | No. of unions | Census population <sup>1</sup> | Population projection <sup>2</sup> |           |                  | Projected population ≥ 14 years <sup>4</sup> | Projected live-birth <sup>5</sup> |
|------------------------|---------------|--------------------------------|------------------------------------|-----------|------------------|----------------------------------------------|-----------------------------------|
|                        |               |                                | 2012                               | 2013      | 2014             |                                              |                                   |
| Bogra                  |               |                                |                                    |           |                  |                                              |                                   |
| Rural                  | 12            | 427,635                        | 433,494                            | 439,432   | 445,453          |                                              |                                   |
| Urban <sup>3</sup>     | 2             | 34,414                         | -                                  |           | -                |                                              |                                   |
| <b>Total</b>           | <b>14</b>     |                                |                                    |           | <b>479,867</b>   | <b>324,870</b>                               | <b>10,653</b>                     |
| Barisal                |               |                                |                                    |           |                  |                                              |                                   |
| Rural                  | 11            | 214,544                        | 217,483                            | 220,463   | 223,483          |                                              |                                   |
| Urban <sup>3</sup>     | 4             | 49,278                         | -                                  |           | -                |                                              |                                   |
| <b>Total</b>           | <b>15</b>     |                                |                                    |           | <b>272,761</b>   | <b>184,659</b>                               | <b>6,055</b>                      |
| Kishoregonj            |               |                                |                                    |           |                  |                                              |                                   |
| Rural                  | 6             | 153,425                        | 155,527                            | 157,658   | 159,818          |                                              |                                   |
| Urban <sup>3</sup>     | 1             | 3,645                          | -                                  |           | -                |                                              |                                   |
| <b>Total</b>           | <b>7</b>      |                                |                                    |           | <b>163,463</b>   | <b>110,664</b>                               | <b>3,629</b>                      |
| Chittagong             |               |                                |                                    |           |                  |                                              |                                   |
| Rural                  | 19            | 548,491                        | 556,005                            | 563,623   | 571,344          |                                              |                                   |
| Urban <sup>3</sup>     | 6             | 101,065                        | -                                  |           | -                |                                              |                                   |
| <b>Total</b>           | <b>25</b>     |                                |                                    |           | <b>672,409</b>   | <b>455,221</b>                               | <b>14,927</b>                     |
| Sylhet                 |               |                                |                                    |           |                  |                                              |                                   |
| Rural                  | 15            | 393,194                        | 398,581                            | 404,041   | 409,577          |                                              |                                   |
| Urban <sup>3</sup>     | 4             | 47,585                         | -                                  |           | -                |                                              |                                   |
| <b>Total</b>           | <b>19</b>     |                                |                                    |           | <b>457,162</b>   | <b>309,498</b>                               | <b>10,149</b>                     |
| Mitford, Dhaka         |               |                                |                                    |           |                  |                                              |                                   |
| Rural                  | 3             | 107,617                        | 109,091                            | 110,586   | 112,101          |                                              |                                   |
| Urban <sup>3</sup>     | 8             | 199,249                        | -                                  |           | -                |                                              |                                   |
| <b>Total</b>           | <b>11</b>     |                                |                                    |           | <b>311,350</b>   | <b>210,784</b>                               | <b>6,912</b>                      |
| All                    |               |                                |                                    |           |                  |                                              |                                   |
| Rural                  | 66            | 1,844,906                      | 1,870,181                          | 1,895,803 | 1,921,775        | 1301,042                                     | 42,663                            |
| Urban <sup>3</sup>     | 25            | 435,236                        | -                                  |           | 435,236          | 294,655                                      | 9,662                             |
| <b>Total</b>           | <b>91</b>     | <b>2,280,142</b>               |                                    |           | <b>2,357,011</b> | <b>1,595,697</b>                             | <b>52,326</b>                     |

<sup>1</sup> Population census in Bangladesh was conducted in 2011

<sup>2</sup> Projected population considering 1.37% growth rate

<sup>3</sup> Population in urban areas was counted through house-to-house visits in the mortality survey

<sup>4</sup> Projected considering 67.7% of population are ≥ 14 years

<sup>5</sup> Live-births are projected considering crude birth rate as 22.2/1000 population

## Appendix 2: Estimation of HEV associated mortality in the catchment areas of six acute jaundice surveillance hospitals by recall period, 2014 (Survey period: November 2014–February 2017)

| Mortality estimation (indicators)                                                                                      | Recall period |            |             |
|------------------------------------------------------------------------------------------------------------------------|---------------|------------|-------------|
|                                                                                                                        | One year      | Two years  | Three years |
| <b><i>Estimated population and live births in the hospital catchment areas</i></b><br>(projected for 2014; Appendix 1) |               |            |             |
| Population aged $\geq 14$ years [ $P$ ]                                                                                | 1,595,697     | 1,595,697  | 1,595,697   |
| Live births [ $B$ ]                                                                                                    | 52,326        | 52,326     | 52,326      |
| <b><i>Surveillance hospitals</i></b>                                                                                   |               |            |             |
| Maternal deaths                                                                                                        |               |            |             |
| Maternal deaths with acute jaundice [ $J_m$ ]                                                                          | 27            | 27         | 27          |
| HEV cases among maternal deaths with acute jaundice [ $E_m$ ] (95% CI)                                                 | 8 (4-13)      | 8 (4-13)   | 8 (4-13)    |
| Non-maternal deaths                                                                                                    |               |            |             |
| Non-maternal deaths with acute jaundice [ $\sum J_i$ ]                                                                 | 275           | 275        | 275         |
| HEV cases among non-maternal deaths with acute jaundice [ $\sum E_i$ ] (95% CI)                                        | 20 (13-30)    | 20 (13-30) | 20 (13-30)  |
| Stillbirths                                                                                                            |               |            |             |
| Stillbirths delivered by mothers with acute jaundice [ $S_j$ ]                                                         | 27            | 27         | 27          |
| Stillbirths delivered by HEV positive mothers [ $S_e$ ] (95% CI)                                                       | 6 (3-11)      | 6 (3-11)   | 6 (3-11)    |
| Neonatal deaths                                                                                                        |               |            |             |
| Neonatal deaths born to mothers with acute jaundice [ $N_j$ ]                                                          | 15            | 15         | 15          |
| Neonatal death cases born to HEV positive mothers [ $N_e$ ] (95% CI)                                                   | 10 (6-13)     | 10 (6-13)  | 10 (6-13)   |

| Mortality estimation (indicators)                                             | Recall period    |                 |                  |
|-------------------------------------------------------------------------------|------------------|-----------------|------------------|
|                                                                               | One year         | Two years       | Three years      |
| <b>Hospital catchment areas</b>                                               |                  |                 |                  |
| Maternal deaths with acute jaundice [ $D_m$ ] (95% CI)                        | 9 (4-17)         | 19 (11-30)      | 25 (16-37)       |
| Non-maternal deaths with acute jaundice [ $\sum D_i$ ] (95% CI)               | 214 (186-245)    | 437 (401-480)   | 587 (401-772)    |
| Stillbirths delivered by mothers with acute jaundice [ $S$ ] (95% CI)         | 28 (19-40)       | 51 (38-67)      | 57 (43-74)       |
| Neonatal deaths born to mothers with acute jaundice [ $N$ ] (95% CI)          | 21 (13-32)       | 35 (24-49)      | 53 (40-69)       |
| <b>HEV associated mortality</b>                                               |                  |                 |                  |
| HEV associated mortality per 100,000 population aged $\geq 14$ years (95% CI) | 1.0 (0.4-1.8)    | 1.1 (0.6-1.5)   | 0.93 (0.6-1.3)   |
| Maternal mortality ratio due to HEV per 100,000 live-births (95% CI)          | 5.1 (1.2-15.8)   | 5.3 (1.7-13.7)  | 4.7 (1.6-11.4)   |
| Stillbirth rate due to HEV per 100,000 live-births (95% CI)                   | 11.9 (3.8-31.5)  | 10.8 (3.8-26.1) | 8.1 (2.9-19.2)   |
| Neonatal mortality rate due to HEV per 100,000 live-births (95% CI)           | 26.7 (10.3-52.0) | 22.3 (9.7-39.4) | 22.5 (10.5-37.5) |
| <b>Estimated HEV associated annual deaths in Bangladesh</b>                   |                  |                 |                  |
| Deaths among population aged $\geq 14$ years                                  | 1102 (422-1901)  | 1114 (634-1584) | 986 (599-1338)   |
| Maternal deaths                                                               | 177 (43-548)     | 186 (60-476)    | 163 (57-395)     |
| Stillbirths                                                                   | 412 (131-1092)   | 375 (133-904)   | 279 (101-664)    |
| Neonatal deaths                                                               | 927 (359-1802)   | 780 (337-1367)  | 780 (365-1298)   |
